# Supplementary material for: Cystic Fibrosis Patients with F508del/Minimal Function Genotype: Laboratory and Nutritional Evaluations after One Year of Elexacaftor/Tezacaftor/Ivacaftor Treatment
Source: MDPI journal article supplement (doi:10.3390/jcm11236900), 2022-11-22
Supplement: s1 [file s1]

**Table S1.** Spearman correlation analysis between bromatological and biochemical data at baseline

|                               |                | <b>BMI</b><br><b>(kg/m<sup>2</sup>)</b> | <b>Vit A</b><br><b>(µg/dL)</b> | <b>Album</b><br><b>(g/dL)</b> | <b>CHOL</b><br><b>(mg/dL)</b> | <b>LDL</b><br><b>(mg/dL)</b> | <b>CHOL/</b><br><b>HDL ratio</b> | <b>no-HDL CHOL</b><br><b>(mg/dL)</b> | <b>LDL/HDL</b><br><b>ratio</b> |
|-------------------------------|----------------|-----------------------------------------|--------------------------------|-------------------------------|-------------------------------|------------------------------|----------------------------------|--------------------------------------|--------------------------------|
| <b>Kcal/day</b>               | r <sub>s</sub> | -0.198                                  | 0.151                          | -0.357                        | -0.536                        | -0.364                       | 0.227                            | -0.382                               | 0.073                          |
|                               | p              | 0.559                                   | 0.699                          | 0.281                         | 0.089                         | 0.272                        | 0.502                            | 0.247                                | 0.832                          |
| <b>Protein</b><br><b>(g)</b>  | r <sub>s</sub> | -0.032                                  | 0.088                          | -0.002                        | -0.009                        | -0.005                       | 0.200                            | -0.009                               | 0.091                          |
|                               | p              | 0.925                                   | 0.821                          | 0.995                         | 0.979                         | 0.989                        | 0.555                            | 0.979                                | 0.790                          |
| <b>Lipids</b><br><b>(g)</b>   | r <sub>s</sub> | -0.284                                  | -0.176                         | -0.266                        | -0.551                        | -0.465                       | -0.205                           | -0.538                               | -0.196                         |
|                               | p              | 0.397                                   | 0.651                          | 0.429                         | 0.079                         | 0.150                        | 0.545                            | 0.088                                | 0.564                          |
| <b>Carb (g)</b>               | r <sub>s</sub> | -0.268                                  | 0.756                          | -0.163                        | -0.451                        | -0.105                       | 0.497                            | -0.164                               | 0.392                          |
|                               | p              | 0.426                                   | <b>0.018</b>                   | 0.632                         | 0.164                         | 0.759                        | 0.120                            | 0.630                                | 0.233                          |
| <b>Fibers</b><br><b>(g)</b>   | r <sub>s</sub> | 0.196                                   | 0.662                          | -0.095                        | -0.111                        | 0.005                        | 0.346                            | 0.041                                | 0.230                          |
|                               | p              | 0.563                                   | 0.052                          | 0.781                         | 0.746                         | 0.989                        | 0.298                            | 0.904                                | 0.495                          |
| <b>Calcium</b><br><b>(mg)</b> | r <sub>s</sub> | 0.143                                   | 0.268                          | -0.279                        | -0.591                        | -0.491                       | 0.073                            | -0.491                               | -0.064                         |
|                               | p              | 0.675                                   | 0.486                          | 0.406                         | 0.056                         | 0.125                        | 0.832                            | 0.125                                | 0.853                          |
| <b>Chol</b><br><b>(mg)</b>    | r <sub>s</sub> | -0.074                                  | -0.201                         | -0.151                        | -0.445                        | -0.555                       | -0.282                           | -0.536                               | -0.318                         |
|                               | p              | 0.829                                   | 0.604                          | 0.658                         | 0.170                         | 0.077                        | 0.401                            | 0.089                                | 0.340                          |
| <b>SFA</b><br><b>(g)</b>      | r <sub>s</sub> | -0.320                                  | -0.272                         | 0.130                         | -0.221                        | -0.355                       | -0.571                           | -0.396                               | -0.424                         |
|                               | p              | 0.337                                   | 0.478                          | 0.703                         | 0.513                         | 0.284                        | 0.066                            | 0.228                                | 0.194                          |
| <b>MuFA</b><br><b>(g)</b>     | r <sub>s</sub> | 0.092                                   | -0.055                         | -0.041                        | -0.350                        | -0.613                       | -0.805                           | -0.628                               | -0.676                         |
|                               | p              | 0.787                                   | 0.888                          | 0.905                         | 0.292                         | <b>0.045</b>                 | <b>0.003</b>                     | <b>0.039</b>                         | <b>0.023</b>                   |
| <b>PuFA (g)</b>               | r <sub>s</sub> | -0.189                                  | 0.277                          | 0.420                         | -0.292                        | -0.359                       | -0.541                           | -0.441                               | -0.426                         |
|                               | p              | 0.577                                   | 0.471                          | 0.199                         | 0.383                         | 0.278                        | 0.085                            | 0.175                                | 0.191                          |

**Table S2.** Spearman correlation analysis between bromatological and biochemical data at 12 months

|                 |                | BMI<br>(kg/m <sup>2</sup> ) | Vit A<br>(µg/dL) | Album<br>(g/dL) | CHOL<br>(mg/dL) | LDL<br>(mg/dL) | CHOL/<br>HDL ratio | no-HDL CHOL<br>(mg/dL) | LDL/HDL<br>ratio |
|-----------------|----------------|-----------------------------|------------------|-----------------|-----------------|----------------|--------------------|------------------------|------------------|
| Kcal/day        | r <sub>s</sub> | -0.437                      | -0.400           | 0.571           | -0.101          | -0.164         | -0.591             | -0.487                 | -0.638           |
|                 | p              | 0.179                       | 0.286            | 0.066           | 0.768           | 0.631          | 0.056              | 0.128                  | <b>0.035</b>     |
| Protein<br>(g)  | r <sub>s</sub> | -0.513                      | -0.251           | 0.664           | 0.354           | 0.096          | -0.224             | -0.146                 | -0.137           |
|                 | p              | 0.107                       | 0.515            | <b>0.026</b>    | 0.285           | 0.779          | 0.508              | 0.667                  | 0.687            |
| Lipids<br>(g)   | r <sub>s</sub> | -0.308                      | -0.583           | 0.350           | -0.128          | -0.182         | -0.373             | -0.415                 | -0.487           |
|                 | p              | 0.357                       | 0.099            | 0.291           | 0.707           | 0.593          | 0.259              | 0.205                  | 0.128            |
| Carb (g)        | r <sub>s</sub> | -0.363                      | -0.083           | 0.470           | -0.252          | -0.382         | -0.773             | -0.642                 | -0.797           |
|                 | p              | 0.272                       | 0.831            | 0.145           | 0.455           | 0.247          | <b>0.005</b>       | <b>0.033</b>           | <b>0.003</b>     |
| Fibers<br>(g)   | r <sub>s</sub> | -0.023                      | -0.100           | -0.076          | -0.218          | -0.173         | 0.387              | 0.009                  | 0.409            |
|                 | p              | 0.946                       | 0.798            | 0.824           | 0.520           | 0.611          | 0.239              | 0.979                  | 0.212            |
| Calcium<br>(mg) | r <sub>s</sub> | -0.525                      | -0.234           | -0.152          | -0.216          | -0.282         | 0.068              | -0.137                 | 0.023            |
|                 | p              | 0.097                       | 0.544            | 0.655           | 0.524           | 0.400          | 0.842              | 0.688                  | 0.947            |
| Chol<br>(mg)    | r <sub>s</sub> | -0.830                      | -0.519           | 0.453           | 0.119           | -0.146         | -0.401             | -0.326                 | -0.438           |
|                 | p              | <b>0.002</b>                | 0.152            | 0.162           | 0.727           | 0.669          | 0.222              | 0.327                  | 0.177            |
| SFA<br>(g)      | r <sub>s</sub> | -0.567                      | -0.667           | 0.292           | 0.005           | -0.014         | -0.197             | -0.144                 | -0.229           |
|                 | p              | 0.069                       | 0.050            | 0.383           | 0.989           | 0.968          | 0.562              | 0.672                  | 0.498            |
| MuFA<br>(g)     | r <sub>s</sub> | -0.125                      | -0.815           | 0.193           | 0.118           | 0.394          | 0.430              | 0.369                  | 0.431            |
|                 | p              | 0.714                       | 0.007            | 0.571           | 0.731           | 0.231          | 0.187              | 0.264                  | 0.185            |
| PuFA (g)        | r <sub>s</sub> | 0.131                       | -0.009           | 0.257           | -0.014          | 0.157          | -0.147             | 0.122                  | -0.049           |
|                 | p              | 0.702                       | 0.983            | 0.446           | 0.968           | 0.645          | 0.665              | 0.720                  | 0.887            |

**Table S3.** Protein and metabolic changes after one year of ETI treatment in patients with CF carrying Minimal Function (MF) heterozygosity with Phe508del mutation

| Genotype group          | Class of defect | Protein changes                              | Albumin changes (%) |         | non-HDL CHOL changes (%) |           |
|-------------------------|-----------------|----------------------------------------------|---------------------|---------|--------------------------|-----------|
|                         |                 |                                              | average (SD)        | min-max | average (SD)             | min-max   |
| First group<br>(n = 5)  | I               | early stop truncation                        | 15 (10)             | 0 – 24  | 18 (51)                  | -28 – 105 |
| Second group<br>(n = 9) | I               | late stop truncation and other MF defects    | 19 (5)              | 5 – 29  | 59 (40) *                | 4 – 129   |
| Third group<br>(n = 6)  | II              | Other not responsive MF defects <sup>a</sup> | 11 (10)             | 0 – 29  | 69 (46) *                | 8 – 159   |

\*p < 0.05 vs first group. <sup>a</sup> Not responsive to ivacaftor or tezacaftor. ETI: elexacaftor/tezacaftor/ivacaftor
